# Instructions for Obtaining ANESTHESIOLOGY Continuing Medical Education (CME) Credit

CME Editors: Leslie C. Jameson, M.D., and Dan J. Kopacz, M.D.

ANESTHESIOLOGY's Journal CME is open to all readers. To take part in ANESTHESIOLOGY Journal-based CME, complete the following steps:

1. Read the CME information presented on this page.
2. Read this month's article designated for CME credit (listed on the right) in either the print or online edition.
3. Register at <http://education.asahq.org/2013-journal-cme> and provide payment.
4. Achieve a score of at least 50% correct on the six-question online journal CME quiz and complete the evaluation.
5. Claim credit in 15-minute increments, for a maximum of 1 *AMA PRA Category 1 Credit*™ per journal article.

## CME Information & Disclosure

**Purpose:** The focus of ANESTHESIOLOGY Journal-based CME is to educate readers on current developments in the science and clinical practice of anesthesiology.

**Target Audience:** ANESTHESIOLOGY Journal-based CME is intended for anesthesiologists. Researchers and other health care professionals with an interest in anesthesiology may also participate.

**Accreditation:** The American Society of Anesthesiologists is accredited by the Accreditation Council for Continuing Medical Education to provide continuing medical education for physicians.

**CME Designation Statement:** The American Society of Anesthesiologists designates this Journal-based CME activity for a maximum of 1 *AMA PRA Category 1 Credit*™. Physicians should claim only the credit commensurate with the extent of their participation in the activity.

## Subscription Rates

Two subscription options are available:

|            | ASA Member | Non-member |
|------------|------------|------------|
| Annual Fee | \$60       | \$120      |
| Per Issue  | \$10       | \$20       |

Payment may be made using Visa or MasterCard.

Please direct any questions about Journal-based CME to: [EducationCenter@asahq.org](mailto:EducationCenter@asahq.org)

**Date of Release:** July 2013

**Termination Date:** July 2016

## This Month's ANESTHESIOLOGY Journal-based CME Article

Read the article by Hovaguimian *et al.* entitled "Effect of Intraoperative High Inspired Oxygen Fraction on Surgical Site Infection, Postoperative Nausea and Vomiting, and Pulmonary Function: Systematic Review and Meta-analysis of Randomized Controlled Trials" on page 303 of this issue.

## Learning Objectives

After successfully completing this activity, the learner will be able to discuss inclusion criteria for meta-analysis evaluation, determine the patient population where high inspired oxygen fraction (FIO<sub>2</sub>) is an effective therapy for reducing surgical site infection rates, determine the patient population where high FIO<sub>2</sub> is an effective therapy for reducing postoperative nausea and vomiting, and determine the patient population where high FIO<sub>2</sub> therapy increases postoperative atelectasis.

## Disclosures

**Editor-in-Chief:** James C. Eisenach, M.D., receives consulting fees from Adynxx, NeuroGesX, and Vertex.

**CME Editors:** Leslie C. Jameson, M.D., receives consulting fees and honoraria from Masimo and honoraria from GE Medical. Dan J. Kopacz, M.D., has reported no financial relationships with commercial interests.

**Authors:** Frédérique Hovaguimian, M.D., Christopher Ly-sakowski, M.D., Nadia Elia, M.D., M.Sc., and Martin R. Tramèr, M.D., D.Phil., have reported no financial relationships with commercial interests.

**ASA Staff:** Employees involved in planning have no financial relationships with commercial interests.

## Resolution of Conflict of Interests

In accordance with the ACCME Standards for Commercial Support of CME, the American Society of Anesthesiologists has implemented mechanisms, prior to the planning and implementation of this Journal-based CME activity, to identify and resolve conflicts of interest for all individuals in a position to control content of this Journal-based CME activity.

## Disclaimer

The information provided in this CME activity is for continuing education purposes only and is not meant to substitute for the independent medical judgment of a health care provider relative to diagnostic and treatment options of a specific patient's medical condition.
